# Supplementary material
Source: PubMed Central journal article supplement (PMC10900857)
Supplement: NIHMS1537180-supplement-1.pdf [file NIHMS1537180-supplement-1.pdf]

## 1 Supplemental Methods and Materials

### 2 Animals

3 Axin2<sup>LacZ/+</sup> (#11809809) and Axin2<sup>CreERT2/+</sup>; R26R<sup>mTmG/+</sup> (#018867 and #007576) mice were obtained from  
4 Jackson Labs. To induce Cre expression in Axin2<sup>CreERT2/+</sup>; R26R<sup>mTmG/+</sup> mice, tamoxifen (4 mg/25 g body  
5 weight) was delivered intraperitoneally for 3 consecutive days; animals were then sacrificed at indicated  
6 time points. In this strain, delivery of tamoxifen instigates a recombination event wherein cells that are  
7 responsive to endogenous Wnt signaling starts to express green fluorescent protein (GFP). Subsequently,  
8 any descendants arising from this initial population of Wnt-responsive cells are also labeled with GFP. This  
9 strategy allowed us to unambiguously determine whether Wnt-responsive cells in the dentin-pulp  
10 complex declined with age.

11 Da $\beta$ cat<sup>Ot</sup> mice were generated by crossing dentin matrix acidic phosphoprotein 1(DMP1)-8kb-Cre mice  
12 with Catnb<sup>lox(ex3)</sup> mice, in which LoxP sites flank exon 3 that encodes for  $\beta$ -catenin degradation (1, 2).  
13 DMP1-8kb-Cre<sup>+/-</sup> mice were crossed with Catnb<sup>lox(ex3)/lox(ex3)</sup> mice to generate Catnb<sup>lox(ex3)/+</sup>; DMP1-8kb-  
14 Cre<sup>+/-</sup> (da $\beta$ cat<sup>Ot</sup> mutant mice) and Catnb<sup>lox(ex3)/+</sup> mice (da $\beta$ cat<sup>Ot</sup> control mice). The da $\beta$ cat<sup>Ot</sup> control mice  
15 are indistinguishable from the wild-type C57BL/6 mice and used as littermate controls in the current  
16 study. Mice expressing green fluorescent protein (GFP) in osteocytes (DMP1<sup>GFP</sup>) (3, 4) were also used in  
17 this study.

### 18 Xgal staining

19 To detect  $\beta$ -galactosidase activity, sections were fixed with 0.2% glutaraldehyde/PBS for 15 min and then  
20 washed 3 times with wash buffer containing 0.005% Nonidet P-40, 0.01% sodium deoxycholate, 2 mM  
21 MgCl<sub>2</sub>/PBS. Tissue sections were stained overnight at 37°C in a staining solution containing 5 mM  
22 potassium ferricyanide, 5 mM potassium ferrocyanide, 2 mM MgCl<sub>2</sub>, and 1 mg/ml Xgal (Thermo Fisher).  
23 Sections were rinsed 2 times in PBS, dehydrated in a graded ethanol series and cleared in CitriSolv, then  
24 mounted with Permount (5, 6).

### 25 $\mu$ CT analyses

26 Micro-computed ( $\mu$ CT) topographies were performed using a SkyScan 1176 scanner (SkyScan, Bruker,  
27 Belgium) at a 5  $\mu$ m resolution. Scanning was done at 45 kV, 556 mA. Samples were reconstructed and  
28 segmented with ScanIP. CT Analyzer software (version 1.02; SkyScan) was employed for morphometric  
29 quantification.

### 30 Immunohistochemistry

31 Primary antibodies and their dilutions are as follows: anti-Osterix (ab22552, Abcam, Cambridge, UK), anti-  
32 CTNNB1 ( $\beta$ -catenin) antibody (BD Biosciences, New Jersey, USA), anti-Nestin (ab6142, Abcam, Cambridge,  
33 UK), anti-Lef1 (2230S, Cell Signaling Technology, USA), anti-GFP (2956, Cell Signaling Technology), and

1 anti-DMP1 (ab103203, Abcam, USA). In all cases, the negative controls were performed at the same time  
2 using PBS to substitute primary antibody. Secondary antibodies are biotinylated goat anti-rabbit IgG  
3 antibody (BA-1000, Vector Lab, Burlingame, USA) and biotinylated horse anti-mouse IgG antibody (BA-  
4 2000, Vector Lab). The staining was visualized by ABC peroxidase standard staining kit (32020, Thermo  
5 Fisher Scientific, Rockford, USA) and DAB peroxidase substrate kit (SK4100, Vector Lab). For GFP staining,  
6 nickel solution was added to the DAB substrate to enhance the signaling, therefore, the GFP<sup>+</sup> cells were  
7 dark purple. For  $\beta$ -catenin staining, fast green was used for counterstaining. Tissue sections were  
8 photographed using a Leica digital imaging system.

### 9 Histomorphometry

10 Histomorphometric measurements were performed to measure the areas of dentin and pulp. From four  
11 separate timepoints, three mice were analyzed, and from each mouse, six tissue sections were chosen for  
12 analysis. The dentin, the pulp, and the dentin+pulp areas were calculated by image J on each tissue  
13 section. The area of interest was specified as either the dentin or the pulp, and this value was then  
14 divided by total area occupied by dentin+pulp.

### 15 16 References:

- 17 1. Tu X, Delgado-Calle J, Condon KW, Maycas M, Zhang H, Carlesso N, et al. Osteocytes  
18 mediate the anabolic actions of canonical Wnt/beta-catenin signaling in bone. Proc Natl Acad  
19 Sci U S A 2015;112(5):E478-486.
- 20 2. Wu Y, Yuan X, Perez KC, Hyman S, Wang L, Pellegrini G, et al. Aberrantly elevated Wnt  
21 signaling is responsible for cementum overgrowth and dental ankylosis. Bone 2019;122:176-  
22 183.
- 23 3. Kalajzic I, Braut A, Guo D, Jiang X, Kronenberg MS, Mina M, et al. Dentin matrix protein 1  
24 expression during osteoblastic differentiation, generation of an osteocyte GFP-transgene. Bone  
25 2004;35(1):74-82.
- 26 4. Ben-awadh AN, Delgado-Calle J, Tu X, Kuhlenschmidt K, Allen MR, Plotkin LI, et al.  
27 Parathyroid hormone receptor signaling induces bone resorption in the adult skeleton by  
28 directly regulating the RANKL gene in osteocytes. Endocrinology 2014;155(8):2797-2809.
- 29 5. Kim JB, Leucht P, Lam K, Luppen C, Ten Berge D, Nusse R, et al. Bone regeneration is  
30 regulated by wnt signaling. J Bone Miner Res 2007;22(12):1913-1923.
- 31 6. Chai Y, Jiang X, Ito Y, Bringas P, Jr., Han J, Rowitch DH, et al. Fate of the mammalian  
32 cranial neural crest during tooth and mandibular morphogenesis. Development  
33 2000;127(8):1671-1679.

34
